# Supplementary material
Source: Copernicus journal article supplement (doi:10.5194/egusphere-2026-3574)
Supplement: Supplementary file 1 [file egusphere-2026-3574-supplement.pdf]

## Supporting Information for

# **Decoupling factors influencing spatial and temporal trends of total nitrogen and ammonia nitrogen levels in lakes across China**

### **Contents of this file**

Supplementary table

Table S1 to S2

### **Introduction**

This supplementary material provides additional information through supplementary table (Table S1-S2) to complement and support the conclusions in the main text.

**Table S1** Hyperparameter configurations and optimization settings for the MLP-XGBoost stacking ensemble framework.

| Model Component       | Hyperparameter                 | Optimized Value / Setting                                           |
|-----------------------|--------------------------------|---------------------------------------------------------------------|
| General Settings      | Target Transformation          | Log-transformation ( $\ln(x+1)$ )                                   |
|                       | Feature Scaling                | Z-score                                                             |
|                       | Temporal Encoding              | Cyclic Sine/Cosine Transformation                                   |
| Level-1: MLP          | Hidden Layer Configuration     | Branch: ( $2 \times d_{in}$ , $1 \times d_{in}$ ); Fusion: (64, 32) |
|                       | Activation Function            | Rectified Linear Unit (ReLU)                                        |
|                       | Attention Mechanism            | Sigmoid-weighted Gating                                             |
|                       | Optimizer                      | Adam ( $LR=1 \times 10^{-3}$ )                                      |
|                       | Training Constraint            | Early Stopping (Patience=15)                                        |
| Level-1: XGBoost      | Iterations( $n_{estimators}$ ) | 5,000 (with Early Stopping)                                         |
|                       | Learning Rate                  | 0.05                                                                |
|                       | Max Tree Depth                 | 7                                                                   |
|                       | Loss Function                  | Mean Squared Error (MSE)                                            |
|                       | Regularization                 | $\lambda=0$ , $\alpha=0$ , $\gamma=0$                               |
| Level-2: Meta-Learner | Model Type                     | Ridge Regression                                                    |
|                       | Regularization                 | [0.1, 1.0, 10.0]                                                    |

**Table S2** Statistical significance of seasonal and regional variations in factor contributions based on Kruskal-Wallis tests.

| Statistical category         | Target Variable | Feature category                 | H statistic | p-value |
|------------------------------|-----------------|----------------------------------|-------------|---------|
| Seasonal Variation           | TN              | External N Loading               | 149.61      | < 0.001 |
|                              |                 | Hydro-climatic Dynamics          | 853.05      | < 0.001 |
|                              |                 | Soil N Storage & Land Cover      | 3473.4      | < 0.001 |
|                              |                 | Topography & Watershed Structure | 2977.57     | < 0.001 |
|                              | NH              | External N Loading               | 28989.73    | < 0.001 |
|                              |                 | Hydro-climatic Dynamics          | 4032.34     | < 0.001 |
|                              |                 | Soil N Storage & Land Cover      | 2551.51     | < 0.001 |
|                              |                 | Topography & Watershed Structure | 36740.81    | < 0.001 |
| limnological zones Variation | TN              | External N Loading               | 1380.8      | < 0.001 |
|                              |                 | Hydro-climatic Dynamics          | 825.87      | < 0.001 |
|                              |                 | Soil N Storage & Land Cover      | 5207.59     | < 0.001 |
|                              |                 | Topography & Watershed Structure | 4245.7      | < 0.001 |
|                              | NH              | External N Loading               | 20948.41    | < 0.001 |
|                              |                 | Hydro-climatic Dynamics          | 4688.88     | < 0.001 |
|                              |                 | Soil N Storage & Land Cover      | 2756        | < 0.001 |
|                              |                 | Topography & Watershed Structure | 28032.63    | < 0.001 |
